# Supplementary material
Source: PubMed Central journal article supplement (PMC3652311)
Supplement: NIHMS455939-supplement-1_si_001.pdf [file NIHMS455939-supplement-1_si_001.pdf]

**Structure-Activity Relationships of Peptides Incorporating a Bioactive Reverse-Turn Heterocycle at the Melanocortin Receptors: Identification of a 5,800-fold Mouse Melanocortin-3 Receptor (mMC3R) Selective Antagonist/Partial Agonist versus the Mouse Melanocortin-4 Receptor (mMC4R)**

Anamika Singh,<sup>1,2</sup> Marvin Dirain,<sup>1</sup> Rachel Witek,<sup>1</sup> James R. Rocca,<sup>3</sup> Arthur S Edison<sup>4</sup> and Carrie Haskell-Luevano<sup>1,2</sup>

Departments of Medicinal Chemistry and Pharmacodynamics,<sup>1</sup> University of Florida, Gainesville, FL 32610, USA, Department of Medicinal Chemistry,<sup>2</sup> University of Minnesota, Minneapolis, MN 55455, USA, McKnight Brain Institute, University of Florida, Gainesville, FL 32611,<sup>3</sup> Department of Biochemistry & Molecular Biology and National High Magnetic Field Laboratory,<sup>4</sup> University of Florida, Gainesville, FL 32610, USA

Table of Contents:

- I. Table S1. <sup>1</sup>H NMR and chemical shifts assignment (ppm) for the selected analogues.
- II. Table S2. Analytical data of the compounds synthesized in this study.
- III. Figure S1. Summary of the NOE intensities from 400 ms NOESY data observed for compounds **2**, **6**, and **8-11**. The height of the bar indicates the strength of the NOE and are categorized as strong (1.8-3.0 Å), medium (1.8-3.5 Å), or weak (1.8-5.0 Å).

IV. Figure S2. Illustration of the compound deviation from random coil values<sup>53</sup> (a) control **2** (DPhe), and the analogues modified at the DPhe position (b) **6** (Pro), (c) **8** DNal(1'), (d) **9** DNal(2'), (e) **10** (pI)DPhe, and (f) **11** (DBip). The H<sup>N</sup> and H<sup>α</sup> protons are represented by solid bars and open bars, respectively. Vertical axes are in parts per million, and the horizontal axes represent the HxRWNA region of each peptide.

V. Table S3. Backbone dihedral angles of the representative structures shown in Figure 4 of the manuscript. The representative structure is the lowest energy conformer of the major family.

**Table S1.** <sup>1</sup>H NMR and chemical shifts assignment (ppm) for the selected analogues.

| amino acid                  | H <sup>N</sup> | H <sup>α</sup> | H <sup>β</sup> | Others                       |
|-----------------------------|----------------|----------------|----------------|------------------------------|
| <b>Analogue 6</b>           |                |                |                |                              |
| Tyr <sup>1</sup>            | -              | 3.97           | -              |                              |
| Cys <sup>2</sup>            | 9.27           | 5.67           | 4.08, 3.98     |                              |
| His <sup>3</sup>            | 9.71           | 6.08           | 4.26, 4.18     | 8.26                         |
| Pro <sup>4</sup>            |                | 5.70           | 4.21, 4.09     | 2.28                         |
| Cys <sup>5*</sup>           | 9.2            | 5.78           | 4.08, 3.96     |                              |
| Arg <sup>6</sup>            | 8.92           | 5.14           | 3.38, 2.51     | 4.08; 2.19, 2.35             |
| Trp <sup>7</sup>            |                | 5.18           | 4.11, 4.04     |                              |
| Asn <sup>8</sup>            | 8.47           | 5.71           | 4.20, 4.08     |                              |
| Ala <sup>9</sup>            | 9.11           | 5.19           | 2.28           |                              |
| Phe <sup>10</sup>           | 8.98           | 5.67           | 4.15, 4.10     | 8.29                         |
| Cys <sup>11</sup>           | 8.87           | 5.71           | 4.18, 3.97     |                              |
| Tyr <sup>12</sup>           | -              | -              | -              |                              |
| Ring CH <sub>2</sub> Arg    |                |                |                | 2.27, 2.54                   |
| Ring CH <sub>2</sub> Acetyl |                |                |                | 3.69, 3.36                   |
| <b>Analogue 8</b>           |                |                |                |                              |
| Tyr <sup>1</sup>            | -              | 4.04           | 2.98, 2.76     |                              |
| Cys <sup>2</sup>            | 9.00           | 5.14           | 2.90, 2.58     |                              |
| His <sup>3</sup>            | 8.47           | 4.88           | 2.64, 2.54     |                              |
| DNal(1') <sup>4</sup>       | 8.89           | 5.49           | 3.40, 3.12     | 7.43                         |
| Cys <sup>5*</sup>           | 8.71           | 4.77           | 2.45, 2.45     |                              |
| Arg <sup>6</sup>            | 7.97           | 3.97           | 2.39, 2.39     | 3.00, 2.91; 1.12, 1.03; 7.38 |
| Trp <sup>7</sup>            |                | 3.85           | 3.53, 3.14     | 7.44, 7.11; 10.80            |
| Asn <sup>8</sup>            | 7.38           | 4.68           | 2.66, 2.60     |                              |
| Ala <sup>9</sup>            | 8.33           | 4.92           | 1.06           |                              |
| Phe <sup>10</sup>           | 8.10           | 4.74           | 2.70, 2.65     | 7.38                         |
| Cys <sup>11</sup>           | 8.79           | 4.97           | 2.77, 2.77     |                              |
| Tyr <sup>12</sup>           | 7.86           | 4.40           | 2.78, 2.66     | 6.96, 7.01                   |
| Ring CH <sub>2</sub> Arg    |                |                |                | 2.40, 3.00                   |
| Ring CH <sub>2</sub> Acetyl |                |                |                | 3.86, 3.98                   |
| <b>Analogue 9</b>           |                |                |                |                              |
| Tyr <sup>1</sup>            | -              | 5.19           | 4.08, 3.96     |                              |
| Cys <sup>2</sup>            | 9.32           | 5.91           | 3.91, 3.82     |                              |
| His <sup>3</sup>            | 9.37           | 5.73           | 4.03, 3.76     |                              |
| DNal(2') <sup>4</sup>       | 9.24           | 6.21           | 4.25, 4.10     |                              |
| Cys <sup>5*</sup>           | 9.08           | 5.79           | 3.91, 3.91     |                              |
| Arg <sup>6</sup>            | 8.78           | 5.03           | 3.40, 2.37     | 4.07, 3.98; 2.23, 2.12       |
| Trp <sup>7</sup>            | -              | -              | -              |                              |
| Asn <sup>8</sup>            | 9.35           | 5.93           | 3.92, 3.82     |                              |
| Ala <sup>9</sup>            | 9.04           | 5.54           | 2.21           |                              |
| Phe <sup>10</sup>           | 9.19           | 5.66           | 4.01, 3.89     |                              |
| Cys <sup>11</sup>           | 8.96           | 5.89           | 3.94, 3.88     |                              |
| Tyr <sup>12</sup>           | 8.85           | 5.54           | 4.01, 3.87     |                              |

|                             |      |      |            |                        |
|-----------------------------|------|------|------------|------------------------|
| Ring CH <sub>2</sub> Arg    |      |      |            | 2.27, 2.54             |
| Ring CH <sub>2</sub> Acetyl |      |      |            | 3.69, 3.36             |
| <b>Analogue 10</b>          |      |      |            |                        |
| Tyr <sup>1</sup>            | -    | -    | -          |                        |
| Cys <sup>2</sup>            | 8.27 | 5.29 | 3.07, 2.95 |                        |
| His <sup>3</sup>            | 8.63 | 4.95 | 3.26, 3.04 |                        |
| (pI)DPhe <sup>4</sup>       | 8.17 | 5.40 | 3.21, 3.08 |                        |
| Cys <sup>5*</sup>           | 8.77 | 4.97 | 3.29, 3.06 |                        |
| Arg <sup>6</sup>            | 7.69 | 4.19 | 2.59, 2.59 | 3.25, 3.15; 1.46, 1.31 |
| Trp <sup>7</sup>            | -    | -    | -          |                        |
| Asn <sup>8</sup>            | 8.37 | 4.96 | 3.15, 3.10 |                        |
| Ala <sup>9</sup>            | 8.05 | 4.89 | 1.38       |                        |
| Phe <sup>10</sup>           | 8.44 | 4.95 | 3.27, 3.17 |                        |
| Cys <sup>11</sup>           | 8.11 | 5.24 | 3.07       |                        |
| Tyr <sup>12</sup>           | 8.07 | 4.77 | 3.19, 3.08 |                        |
| Ring CH <sub>2</sub> Arg    |      |      |            |                        |
| <b>Analogue 11</b>          |      |      |            |                        |
| Tyr <sup>1</sup>            | -    | 5.22 | 4.13, 3.97 |                        |
| Cys <sup>2</sup>            | 9.36 | 5.97 | 3.97, 3.88 |                        |
| His <sup>3</sup>            | 9.48 | 5.79 | 4.15, 3.94 | 9.36, 8.41             |
| DBip <sup>4</sup>           | 9.24 | 6.19 | 4.12, 4.06 | 8.41, 8.61             |
| Cys <sup>5*</sup>           | 9.03 | 5.82 | 3.99, 3.99 |                        |
| Arg <sup>6</sup>            | 8.81 | 5.04 | 3.41, 2.41 | 4.09, 4.02; 2.26, 2.15 |
| Trp <sup>7</sup>            | -    | 5.97 | 4.00, 3.94 | 8.57, 8.13; 10.78      |
| Asn <sup>8</sup>            | 9.37 | 5.78 | 3.97, 3.97 |                        |
| Ala <sup>9</sup>            | 9.06 | 5.56 | 2.25       |                        |
| Phe <sup>10</sup>           | 9.28 | 5.72 | 4.17, 4.02 | 8.63, 8.48             |
| Cys <sup>11</sup>           | 9.06 | 5.97 | 3.99, 3.99 |                        |
| Tyr <sup>12</sup>           | 8.90 | 5.59 | 4.06, 3.93 | 8.13, 7.79             |
| Ring CH <sub>2</sub> Arg    |      |      |            |                        |
| Ring CH <sub>2</sub> Acetyl |      |      |            |                        |
| Ring CH <sub>2</sub> Acetyl |      |      |            |                        |

| <b>Analogue 2</b>           | <b>Control</b> |      |            |                        |
|-----------------------------|----------------|------|------------|------------------------|
| Tyr <sup>1</sup>            |                | 4.82 |            |                        |
| Cys <sup>2</sup>            | 8.80           | 5.65 | 3.53, 3.43 |                        |
| His <sup>3</sup>            | 9.02           | 5.37 | 3.69, 3.51 | 8.16, 7.68             |
| DPhe <sup>4</sup>           | 8.65           | 5.77 | 3.70, 3.56 |                        |
| Cys <sup>5*</sup>           | 8.62           | 5.40 | 3.83, 3.73 |                        |
| Arg <sup>6</sup>            | 8.22           | 4.06 | 3.02, 3.02 | 3.71, 3.59; 1.82, 1.74 |
| Trp <sup>7</sup>            |                |      |            |                        |
| Asn <sup>8</sup>            | 8.85           | 5.35 | 3.73, 3.58 |                        |
| Ala <sup>9</sup>            | 8.53           | 5.22 | 1.82       |                        |
| Phe <sup>10</sup>           | 8.88           | 5.34 | 3.74, 3.57 | 8.18                   |
| Cys <sup>11</sup>           | 8.56           | 5.59 | 3.62, 3.53 |                        |
| Tyr <sup>12</sup>           | 8.47           | 5.19 | 3.64, 3.51 | 8.23, 7.25             |
| Ring CH <sub>2</sub> Arg    |                |      |            | 3.74, 3.04             |
| Ring CH <sub>2</sub> Acetyl |                |      |            | 4.03, 3.81             |

---

Cys\* designates the thioether linkage.

**Table S2.** Analytical data for the ligands prepared in this study.

| Peptide | R <sub>1</sub> | R <sub>2</sub>  | R <sub>3</sub> | R <sub>4</sub>  | HPLC Purity (%) | HPLC K' MeCN, MeOH | Mol. Wt. Calcd and Observed (mass spec) |
|---------|----------------|-----------------|----------------|-----------------|-----------------|--------------------|-----------------------------------------|
| 1       |                |                 |                |                 | >99             | 4.5, 8.0           | 1506.74 (1506.58)                       |
| 2       | His            | DPhе            | Arg            | Trp             | >96             | 5.5, 10.0          | 1635.89 (1635.72)                       |
| 3       | <b>Ala</b>     | DPhе            | Arg            | Trp             | >97             | 5.5, 8.8           | 1569.83 (1569.64)                       |
| 4       | <b>Phe</b>     | DPhе            | Arg            | Trp             | >95             | 6.3, 10.9          | 1645.92 (1645.66)                       |
| 5       | <b>Pro</b>     | DPhе            | Arg            | Trp             | >99             | 5.8, 11.0          | 1595.87 (1595.62)                       |
| 6       | His            | <b>Pro</b>      | Arg            | Trp             | >99             | 4.9, 7.7           | 1585.83 (1585.69)                       |
| 7       | His            | <b>Ala</b>      | Arg            | Trp             | >97             | 4.3, 7.7           | 1559.79 (1559.71)                       |
| 8       | His            | <b>DNal(1')</b> | Arg            | Trp             | >97             | 5.4, 9.1           | 1685.95 (1685.77)                       |
| 9       | His            | <b>DNal(2')</b> | Arg            | Trp             | >96             | 5.9, 10.1          | 1685.95 (1685.79)                       |
| 10      | His            | <b>(pI)DPhе</b> | Arg            | Trp             | >96             | 6.0, 9.0           | 1761.79 (1761.70)                       |
| 11      | His            | <b>DBip</b>     | Arg            | Trp             | >99             | 6.2, 10.7          | 1711.99 (1711.73)                       |
| 12      | His            | DPhе            | <b>Ala</b>     | Trp             | >95             | 6.1, 10.9          | 1550.78 (1573.82)                       |
| 13      | His            | DPhе            | <b>Lys</b>     | Trp             | >95             | 5.9, 8.4           | 1607.88 (1630.21)                       |
| 14      | His            | DPhе            | <b>hArg</b>    | Trp             | >95             | 5.9, 8.3           | 1649.92 (1650.58)                       |
| 15      | His            | DPhе            | <b>Pro</b>     | Trp             | >95             | 4.6, 8.7           | 1547.81 (1570.12)                       |
| 16      | His            | DPhе            | Arg            | <b>Ala</b>      | >99             | 5.1, 7.2           | 1520.76 (1520.67)                       |
| 17      | His            | DPhе            | Arg            | <b>Nal(2')</b>  | >99             | 6.1, 10.4          | 1646.91 (1646.80)                       |
| 18      | His            | DPhе            | Arg            | <b>DNal(2')</b> | >99             | 6.2, 10.3          | 1646.91 (1646.72)                       |
| 19      | His            | DPhе            | Arg            | <b>Bip</b>      | >96             | 6.3, 9.3           | 1672.95 (1672.74)                       |

The HPLC k' value equals [(peptide retention time – solvent retention time)/ solvent retention time]. Two different solvent systems were used. Solvent system 1 is 10% acetonitrile (MeCN) in 0.1% trifluoroacetic acid/H<sub>2</sub>O with a gradient to 90% acetonitrile over 35 min. Solvent system 2 is 10% methanol (MeOH) in 0.1% trifluoroacetic acid/H<sub>2</sub>O with a gradient to 90% methanol over 35 min. An analytical Vydac C18 column (Vydac 218TP104) with a flow rate of 1.5 ml/min was used for analytical characterization. The peptide purity was determined by HPLC in both solvent systems at a wavelength of 214 nm.

**Figure S1.** Summary of the NOE intensities from 400 ms NOESY data observed for compounds **2**, **6**, and **8-11**. The height of the bar indicates the strength of the NOE and are categorized as strong (1.8-3.0 Å), medium (1.8-3.5 Å), or weak (1.8-5.0 Å).

**Analogue 6** Tyr<sup>1</sup> – Cys<sup>2</sup> – His<sup>3</sup> – Pro<sup>4</sup> – Cys<sup>5\*</sup> – Arg<sup>6</sup> – Trp<sup>7</sup> – Asn<sup>8</sup> – Ala<sup>9</sup> – Phe<sup>10</sup> – Cys<sup>11</sup> – Tyr<sup>12</sup>

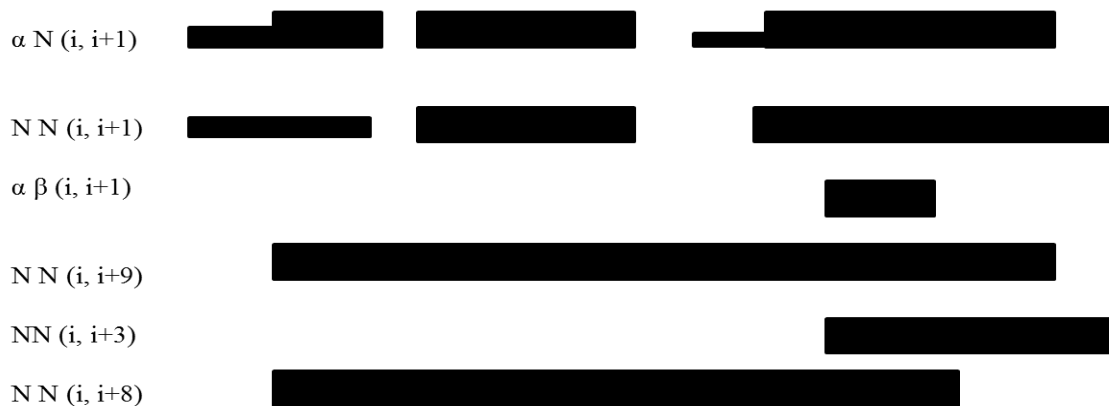

**Analogue 8** Tyr<sup>1</sup> – Cys<sup>2</sup> – His<sup>3</sup> – DNal (1')<sup>4</sup> – Cys<sup>5\*</sup> – Arg<sup>6</sup> – Trp<sup>7</sup> – Asn<sup>8</sup> – Ala<sup>9</sup> – Phe<sup>10</sup> – Cys<sup>11</sup> – Tyr<sup>12</sup>

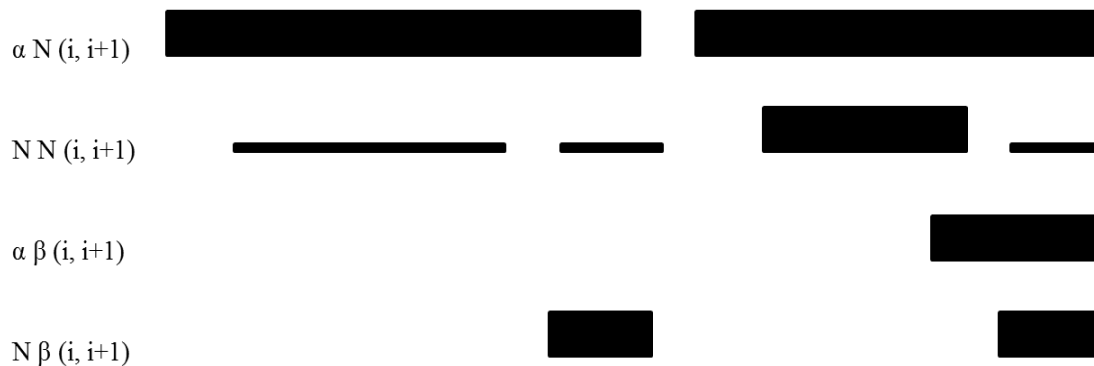

**Analogue 9** Tyr<sup>1</sup> – Cys<sup>2</sup> – His<sup>3</sup> – DNal (2')<sup>4</sup> – Cys<sup>5\*</sup> – Arg<sup>6</sup> – Trp<sup>7</sup> – Asn<sup>8</sup> – Ala<sup>9</sup> – Phe<sup>10</sup> – Cys<sup>11</sup> – Tyr<sup>12</sup>

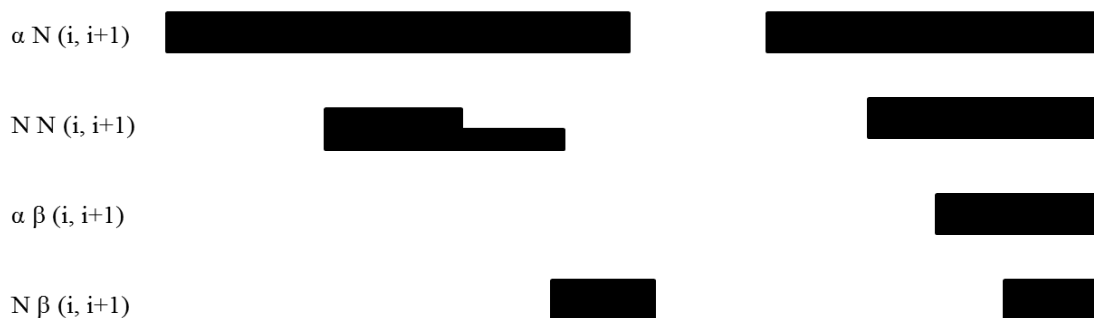

**Analogue 10** Tyr<sup>1</sup> – Cys<sup>2</sup> – His<sup>3</sup> – (pI)DPhe<sup>4</sup> – Cys<sup>5\*</sup> – Arg<sup>6</sup> – Trp<sup>7</sup> – Asn<sup>8</sup> – Ala<sup>9</sup> – Phe<sup>10</sup> – Cys<sup>11</sup> – Tyr<sup>12</sup>

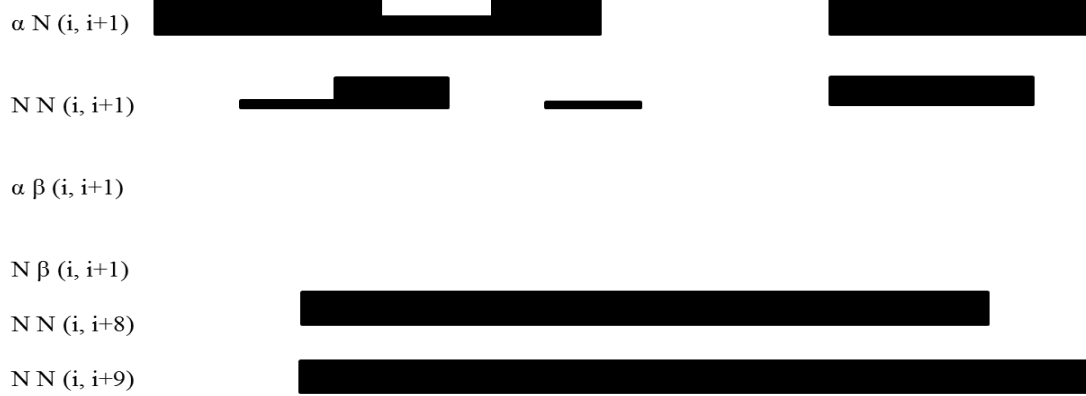

**Analogue 11** Tyr<sup>1</sup> – Cys<sup>2</sup> – His<sup>3</sup> – DBip<sup>4</sup> – Cys<sup>5\*</sup> – Arg<sup>6</sup> – Trp<sup>7</sup> – Asn<sup>8</sup> – Ala<sup>9</sup> – Phe<sup>10</sup> – Cys<sup>11</sup> – Tyr<sup>12</sup>

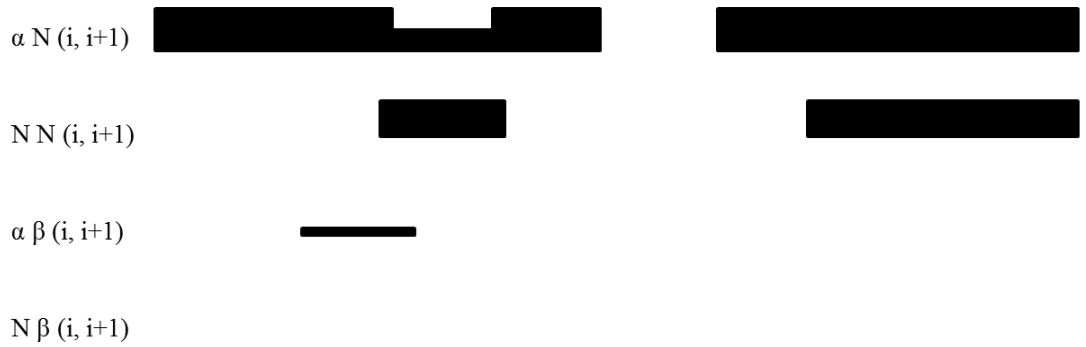

**Analogue 2 Control** Tyr<sup>1</sup> – Cys<sup>2</sup> – His<sup>3</sup> – DPhe<sup>4</sup> – Cys<sup>5\*</sup> – Arg<sup>6</sup> – Trp<sup>7</sup> – Asn<sup>8</sup> – Ala<sup>9</sup> – Phe<sup>10</sup> – Cys<sup>11</sup> – Tyr<sup>12</sup>

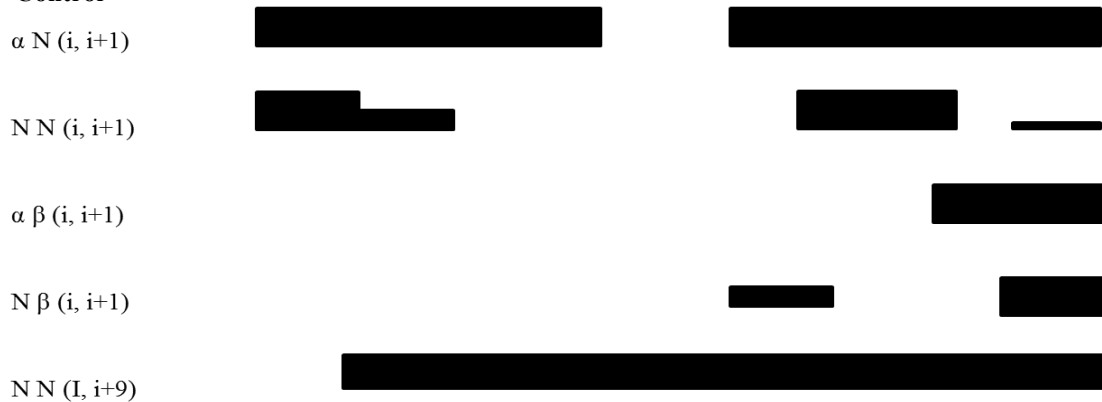



**Figure S2.** Illustration of the compound deviation from random coil values (a) control **2** (DPhe), and the analogues modified at the DPhe position (b) **6** (Pro), (c) **8** DNal(1'), (d) **9** DNal(2'), (e) **10** (pI)DPhe, and (f) **11** (DBip). The H<sup>N</sup> and H<sup>α</sup> protons are represented by solid bars and open bars, respectively. Vertical axes are in parts per million, and the horizontal axes represent the HxRWNA region of each peptide.

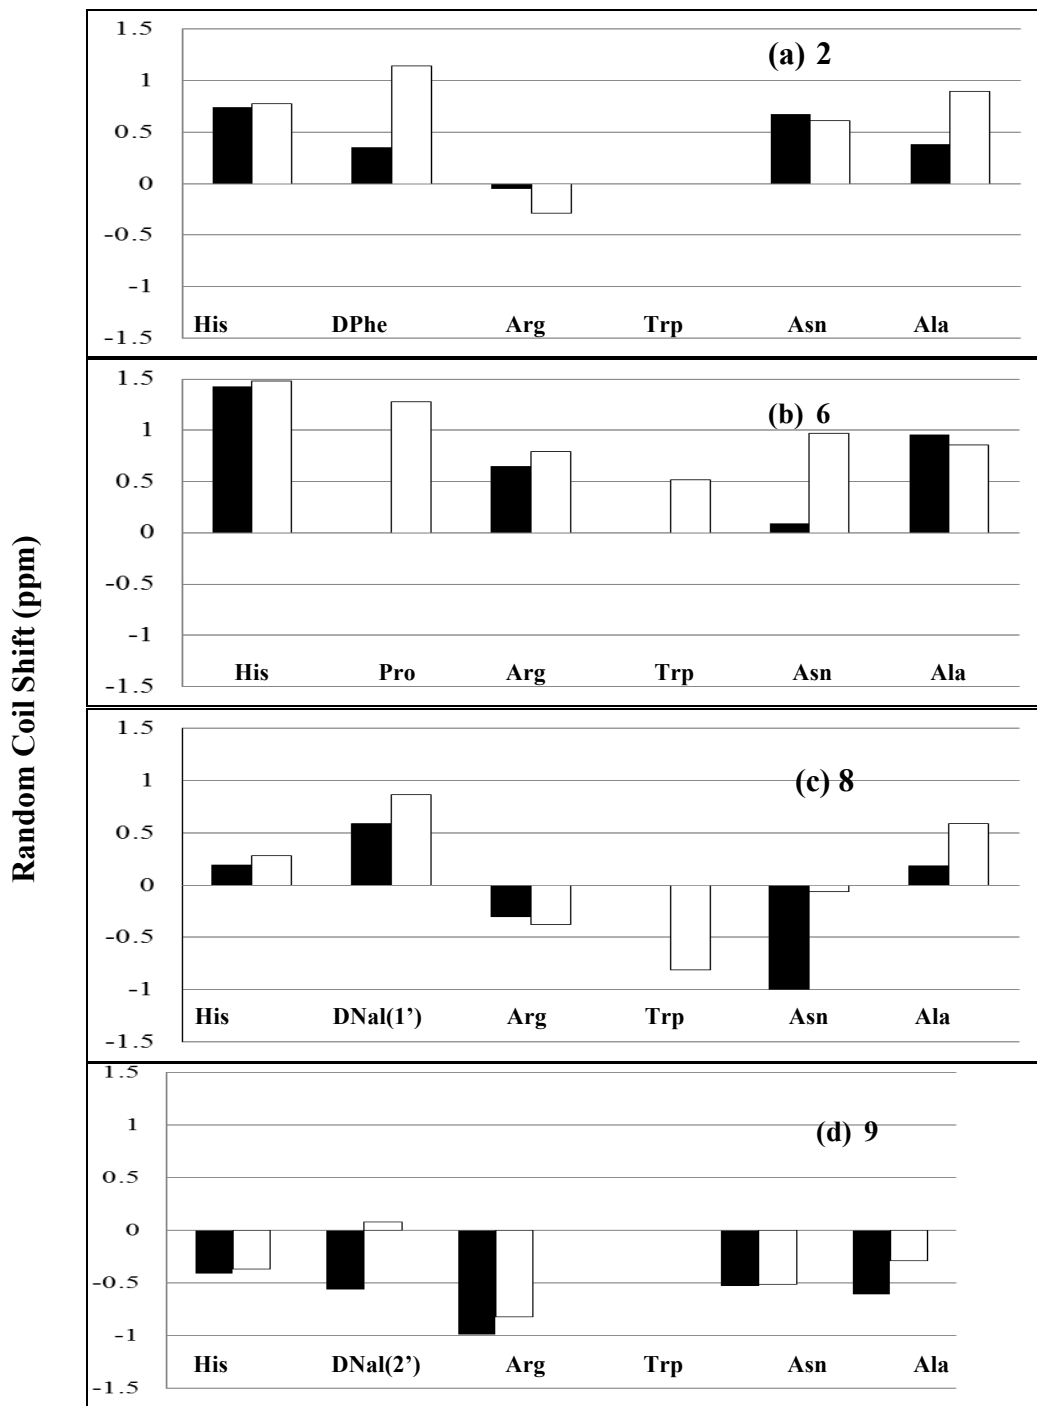

Random Coil Shift (ppm)

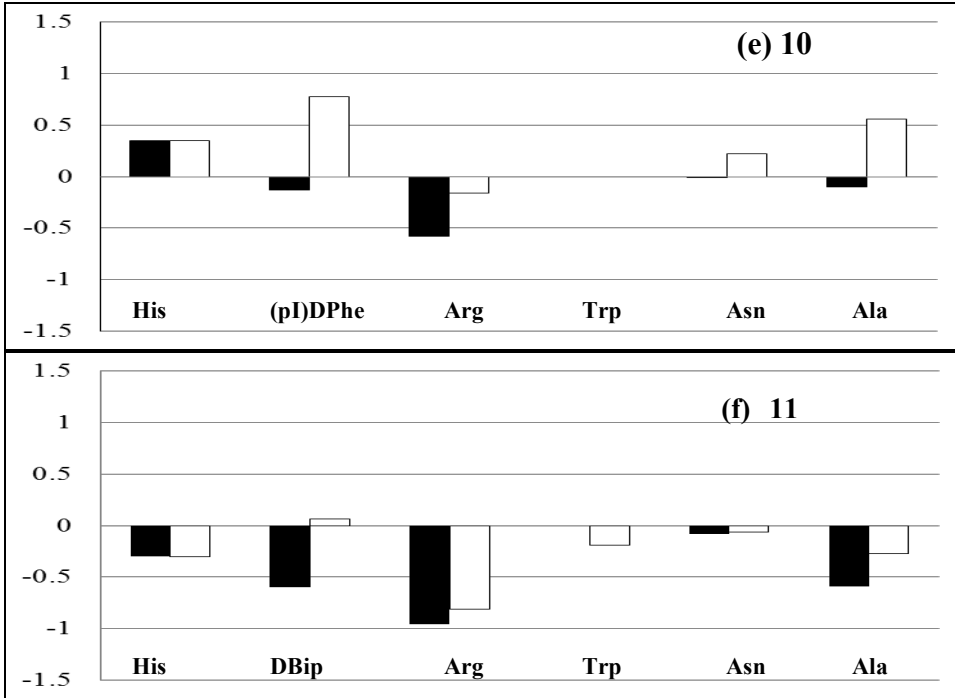

Amino Acids

**Table S3.** Backbone dihedral angles of the representative structures shown in Figure 4 of the manuscript. The representative structure is the lowest energy conformer of the major family.

| <b>Analogue #</b>   | <b>2</b><br>X <sub>aa</sub> =DPhe | <b>6</b><br>X <sub>aa</sub> =Pro | <b>8</b><br>X <sub>aa</sub> =DNal(1') | <b>9</b><br>X <sub>aa</sub> =DNal(2') | <b>10</b><br>X <sub>aa</sub> =(pI)DPhe | <b>11</b><br>X <sub>aa</sub> =DBip |
|---------------------|-----------------------------------|----------------------------------|---------------------------------------|---------------------------------------|----------------------------------------|------------------------------------|
| φ Cys2              | -<br>139.7943                     | 102.5854                         | -94.9054                              | 2.1483                                | -142.46                                | -<br>137.7133                      |
| ψ Cys2              | 42.1078                           | -41.7689                         | 48.7695                               | 89.5823                               | -86.7403                               | 127.3906                           |
| φ His3              | -<br>110.8693                     | -153.876                         | 55.3393                               | -148.9058                             | -82.4417                               | -<br>151.3101                      |
| ψ His3              | 37.5965                           | 145.5609                         | 22.159                                | 60.1431                               | 70.0002                                | 48.5147                            |
| φ X <sub>aa</sub> 4 | -63.8368                          | 85.9529                          | 109.6695                              | -54.5003                              | 75.0062                                | 158.591                            |
| ψ X <sub>aa</sub> 4 | -52.19                            | -51.2365                         | -44.8168                              | -50.6896                              | -72.6511                               | -44.1138                           |
| φ Cys5              | -93.4163                          | -137.304                         | -170.4402                             | -149.4562                             | -82.1177                               | -57.225                            |
| ψ Cys5              | 173.8435                          | 67.3853                          | 76.0974                               | 178.3109                              | 172.0694                               | 160.3195                           |
| φ Arg6              | -<br>103.6818                     | -75.9705                         | -86.4828                              | -84.8252                              | -72.0386                               | -57.225                            |
| ψ Arg6              | 83.4845                           | -4.8862                          | 0                                     | -54.6087                              | -70.5714                               | 160.3195                           |
| φ Trp7              | 46.3122                           | -176.857                         | 106.5383                              | 102.183                               | 85.0501                                | -<br>108.4325                      |
| ψ Trp7              | 50.5596                           | -72.0929                         | 130.0239                              | -61.9895                              | -35.1032                               | -45.7851                           |
| φ Asn8              | 66.2266                           | -134.977                         | -147.8068                             | -111.9809                             | -133.8701                              | 62.4186                            |
| ψ Asn8              | 48.0761                           | 30.3976                          | 57.8726                               | 166.381                               | 45.2415                                | 49.3589                            |
| φ Ala9              | -<br>164.9114                     | -135.487                         | 60.7528                               | 83.8372                               | -150.8847                              | -145.95                            |
| ψ Ala9              | 56.111                            | 65.404                           | 51.1402                               | 178.4646                              | 49.7409                                | 46.5598                            |
| φ Phe10             | 176.2256                          | 30.2742                          | 79.5296                               | 54.591                                | -96.9192                               | 89.3883                            |
| ψ Phe10             | 153.4304                          | 73.1155                          | 31.9244                               | 35.2484                               | 34.8037                                | 19.433                             |
| φ Cys11             | -78.693                           | 43.1145                          | 130.2803                              | 78.6634                               | 46.7375                                | -<br>178.3756                      |
| ψ Cys11             | 160.2418                          | 57.8151                          | -39.3673                              | 29.3244                               | 84.6526                                | 162.9706                           |
